# Supplementary material for: Probing the vibrational spectroscopy of the deprotonated thymine radical by photodetachment and state-selective autodetachment photoelectron spectroscopy via dipole-bound states
Source: Royal Society of Chemistry journal article supplement (doi:10.1039/c5sc00704f), 2015-01-01
Supplement: c5sc00704f1.pdf [file c5sc00704f1.pdf]

## Supplementary Information

# Probing the Vibrational Spectroscopy of the Deprotonated Thymine Radical by Photodetachment and State-Selective Autodetachment Photoelectron Spectroscopy via Dipole-Bound States

Dao-Ling Huang,<sup>1</sup> Hong-Tao Liu,<sup>1,2</sup> Chuan-Gang Ning,<sup>3</sup> Guo-Zhu Zhu,<sup>1</sup> and Lai-Sheng Wang<sup>1,a)</sup>

<sup>1</sup>*Department of Chemistry, Brown University, Providence, Rhode Island 02912, USA*

<sup>2</sup>*Shanghai Institute of Applied Physics, Chinese Academy of Sciences, Shanghai 201800, China*

<sup>3</sup>*Department of Physics, State Key Laboratory of Low-Dimensional Quantum Physics, Tsinghua University, Beijing 100084, China*

<sup>a)</sup>Email: Lai-Sheng\_Wang@brown.edu

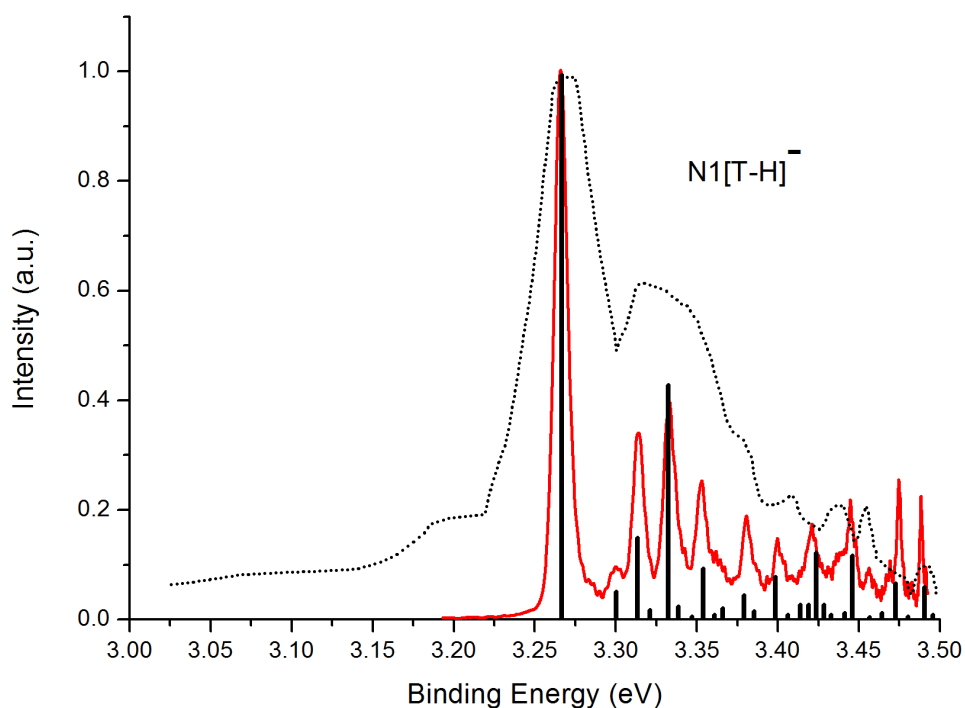

**Figure S1.** Comparison of the current 354.84 nm photoelectron spectrum (red) with the previous spectrum at the same wavelength (dotted line) and the previous Franck-Condon simulation (vertical bars) for the N1[T-H]<sup>-</sup> isomer.<sup>23</sup>

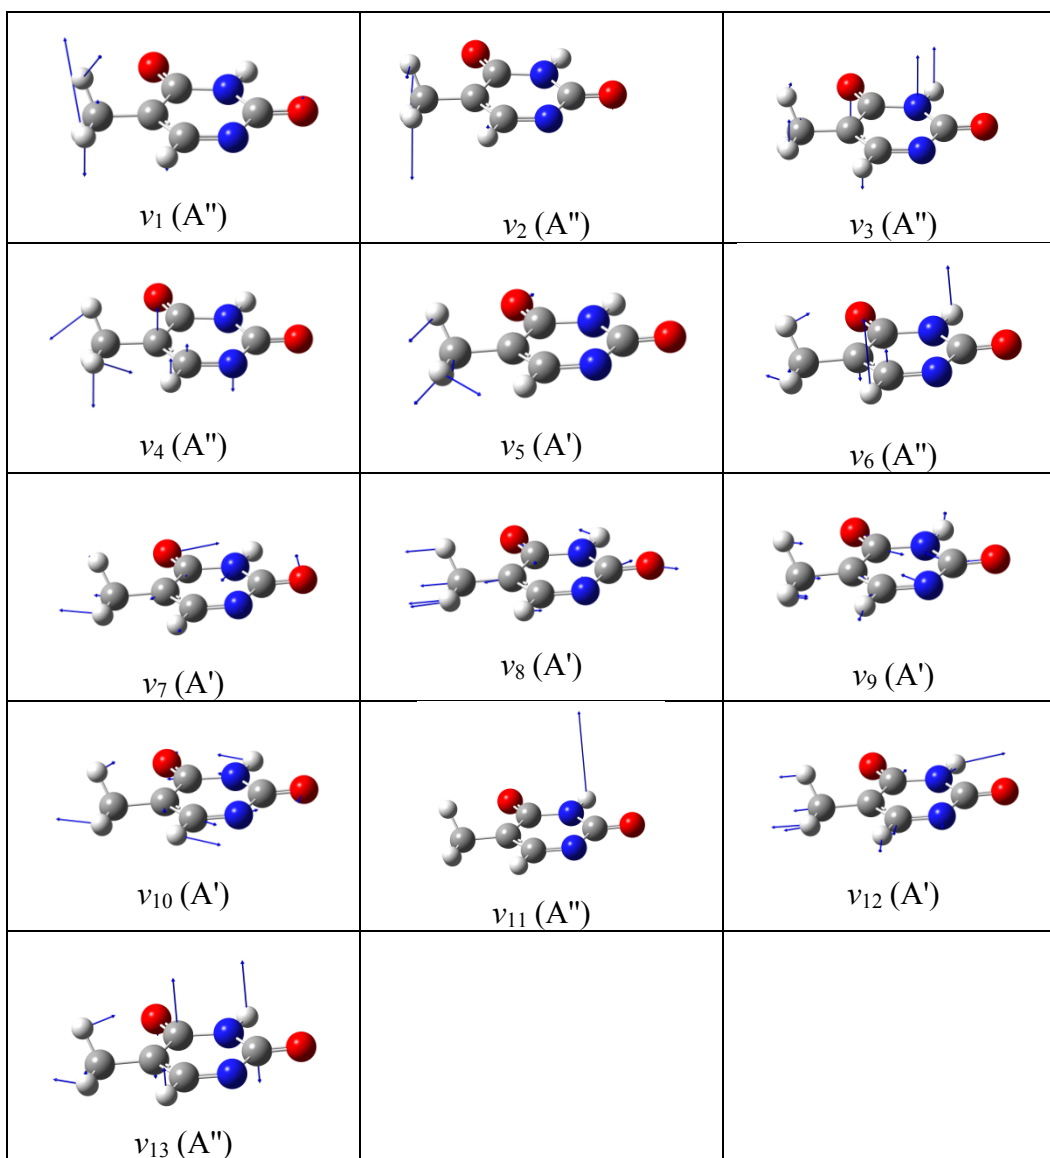

**Figure S2.** The thirteen lowest frequency normal modes of  $N1[T-H]^\bullet$ . The arrows indicate the displacement vectors. See Table S1 and Table 2 for their calculated frequencies.

**Table S1** The complete list of the symmetries and vibrational frequencies of the N1[T-H]• radical calculated with the B3LYP/6-311++G(d, p) method.

| Mode       | Symmetry | Theoretical (cm <sup>-1</sup> ) |
|------------|----------|---------------------------------|
| $\nu_1$    | A''      | 70                              |
| $\nu_2$    | A''      | 93                              |
| $\nu_3$    | A''      | 135                             |
| $\nu_4$    | A''      | 262                             |
| $\nu_5$    | A'       | 285                             |
| $\nu_6$    | A''      | 388                             |
| $\nu_7$    | A'       | 397                             |
| $\nu_8$    | A'       | 450                             |
| $\nu_9$    | A'       | 555                             |
| $\nu_{10}$ | A'       | 608                             |
| $\nu_{11}$ | A''      | 670                             |
| $\nu_{12}$ | A'       | 720                             |
| $\nu_{13}$ | A''      | 727                             |
| $\nu_{14}$ | A''      | 751                             |
| $\nu_{15}$ | A'       | 795                             |
| $\nu_{16}$ | A'       | 918                             |
| $\nu_{17}$ | A''      | 941                             |
| $\nu_{18}$ | A'       | 998                             |
| $\nu_{19}$ | A''      | 1019                            |
| $\nu_{20}$ | A'       | 1179                            |
| $\nu_{21}$ | A'       | 1223                            |
| $\nu_{22}$ | A'       | 1300                            |
| $\nu_{23}$ | A'       | 1342                            |
| $\nu_{24}$ | A'       | 1402                            |
| $\nu_{25}$ | A'       | 1413                            |
| $\nu_{26}$ | A'       | 1423                            |
| $\nu_{27}$ | A''      | 1453                            |
| $\nu_{28}$ | A'       | 1484                            |
| $\nu_{29}$ | A'       | 1488                            |
| $\nu_{30}$ | A'       | 1708                            |
| $\nu_{31}$ | A'       | 1720                            |
| $\nu_{32}$ | A'       | 3021                            |
| $\nu_{33}$ | A''      | 3063                            |
| $\nu_{34}$ | A'       | 3121                            |
| $\nu_{35}$ | A'       | 3127                            |
| $\nu_{36}$ | A'       | 3581                            |
